# Supplementary material for: A general solvent system for the analysis of lignosulfonates by 31P NMR
Source: Royal Society of Chemistry journal article supplement (doi:10.1039/d1ay01241j), 2021-01-01
Supplement: d1ay01241j1.pdf [file d1ay01241j1.pdf]

## Supplementary Information

### **A general solvent system for the analysis of lignosulfonates by $^{31}\text{P}$ NMR**

Gerhild K. Wurzer<sup>a</sup>, Markus Bacher<sup>a</sup>, Hubert Hettegger<sup>a</sup>, Ivan Sumerskii<sup>a</sup>, Oliver Musl<sup>a</sup>, Karin Fackler<sup>b</sup>, Robert H. Bischof<sup>b</sup>, Antje Potthast<sup>a</sup>, Thomas Rosenau<sup>a,c</sup> †

#### Materials and Methods – Lignosulfonates:

1. LS 1-11: used for validation

Figure 3+4: hardwood (beech),  $\text{Mg}^{2+}$ , for detailed characterisation see Mimini et al. 2019<sup>1</sup>, purified according to Sumerskii et al. 2015<sup>2</sup> = LS1

Figure 5: softwood + hardwood mixture (spruce, beech),  $\text{Mg}^{2+}$ , purified according to Sumerskii et al. 2015<sup>2</sup> = LS2-11

2. LS 1 ammonoxidised: see also Materials and Methods part, additional characterization will be published elsewhere (Wurzer et al. 2022)
3. LS 12: softwood + hardwood mixture (spruce, beech),  $\text{Mg}^{2+}$ , purified according to Sumerskii et al. 2015<sup>2</sup>
4. LS 13: hardwood (eucalyptus),  $\text{Na}^+$ , NSSC (neutral sulphite semi-chemical pulping process), purified according to Sumerskii et al. 2015<sup>2</sup>
5. LS 13 F1-F7 (F = fraction): HIC separated LS fractions with different molecular weights, data will be published elsewhere (Musl et al. 2021/2022)

#### References:

- 1 V. Mimini, E. Sykacek, S. N. A. Syed Hashim, J. Holzweber, H. Hettegger, K. Fackler, A. Potthast, N. Mundigler and T. Rosenau, *Journal of Wood Chemistry and Technology*, 2019, **39**, 14–30.
- 2 I. Sumerskii, P. Korntner, G. Zinovyev, T. Rosenau and A. Potthast, *RSC Advances*, 2015, **5**, 92732–92742.
